# Supplementary material
Source: publisher site journal article supplement (https://www.dovepress.com/article/586010)
Supplement: Supplementary file 1 [file Supplementary%20Materials.docx]

**Supplementary Materials**

**Table S1.** Comparison of baseline characteristics between recurrence and non-recurrence groups

**Table S2.** ACRN recurrence rates stratified by SII levels and changes

**Table S3.** Univariable Cox proportional hazards regression analysis for postoperative ACRN recurrence

**Table S4**. Sensitivity analysis of SII levels and changes and postoperative ACRN recurrence risk

**Figure S1**. Distribution of baseline SII and ΔSII

**Figure S2**. Residual plots for the association between ΔSII and postoperative ACRN recurrence

**Figure S3**. Forest plot of independent factors for postoperative ACRN recurrence

**Figure S4.** Nomogram predictive model for postoperative ACRN recurrence

**Table S1.** Comparison of baseline characteristics between recurrence and non-recurrence groups

| Variables | Total  (n=1855) | Non-recurrence group(n=1689) | Recurrence group(n=166 ) | χ²/Z | *P* value |
| --- | --- | --- | --- | --- | --- |
| Sex, No. (%) |  |  |  | 0.03 | 0.866 |
| Fmale | 626 | 569(33.69) | 57(34.34) |  |  |
| Male | 1299 | 1120(66.31) | 109(65.66) |  |  |
| Age, No. (%) |  |  |  | 16.21 | <0.001 |
| 18-44 | 294 | 273(16.16) | 21(12.65) |  |  |
| 45-60 | 940 | 874(51.75) | 66(35.76) |  |  |
| ≥60 | 621 | 542(32.09) | 79(47.59) |  |  |
| Smoking history, No. (%) |  |  |  | 0.17 | 0.683 |
| No | 1519 | 1385(82.00) | 134(80.72) |  |  |
| Yes | 336 | 304(18.00) | 32(19.28) |  |  |
| Alcohol consumption history, No. (%) |  |  |  | 0.11 | 0.742 |
| No | 1394 | 1271(75.25) | 123(74.10) |  |  |
| Yes | 461 | 418(24.75) | 43(25.90) |  |  |
| BMI, No. (%) |  |  |  | 3.00 | 0.223 |
| <18.5kg/m2 | 718 | 656(38.84) | 62(37.35) |  |  |
| 18.5-23.9kg/m2 | 46 | 45(2.66) | 1(0.60) |  |  |
| >23.9kg/m2 | 1091 | 988(58.50) | 103(62.05) |  |  |
| Adenoma number, No. (%) |  |  |  | 16.31 | <0.001 |
| 1 | 1437 | 1329(78.69) | 108(65.06) |  |  |
| 2 | 320 | 282(16.70) | 38(22.89) |  |  |
| ≥3 | 98 | 78(4.62) | 20(12.05) |  |  |
| Adenoma size, No. (%) |  |  |  | 29.59 | <0.001 |
| 1~5mm | 929 | 872(51.63) | 57(34.34) |  |  |
| 6~10mm | 465 | 425(25.16) | 40(24.10) |  |  |
| >10mm | 461 | 392(23.21) | 69(41.57) |  |  |
| Adenoma histology, No. (%) |  |  |  | 7.91 | 0.005 |
| Tubular adenoma | 1264 | 1167(69.09) | 97(58.43) |  |  |
| Tubulovillous adenoma or villous adenoma | 591 | 522(30.91) | 69(41.57) |  |  |
| Adenoma location, No. (%) |  |  |  | 14.97 | <0.001 |
| Distal colon or rectum | 860 | 794(47.01) | 66(39.76) |  |  |
| Proximal colon | 741 | 680(40.26) | 61(36.75) |  |  |
| Both | 254 | 215(12.73) | 39(23.49) |  |  |
| Grade of adenoma dysplasia, No. (%) |  |  |  | 13.85 | <0.001 |
| Low-grade dysplasia | 1712 | 1571(93.01) | 141(84.94) |  |  |
| High-grade dysplasia | 143 | 118(6.99) | 25(15.06) |  |  |
| Abdominal pain, No. (%) |  |  |  | 0.73 | 0.392 |
| No | 1379 | 1251(74.07) | 128(77.11) |  |  |
| Yes | 476 | 438(25.93) | 38(22.89) |  |  |
| Abdominal distension, No. (%) |  |  |  | 0.18 | 0.673 |
| No | 1670 | 1519(89.93) | 151(90.96) |  |  |
| Yes | 185 | 170(10.07) | 15(9.04) |  |  |
| Change in bowel habits, No. (%) |  |  |  | 0.74 | 0.389 |
| No | 1689 | 1549(91.71) | 149(89.76) |  |  |
| Yes | 157 | 140(8.29) | 17(10.24) |  |  |
| Change in stool consistency, No. (%) | | | | 0.33 | 0.566 |
| No | 1699 | 1545(91.47) | 154(92.77) |  |  |
| Yes | 156 | 144(8.53) | 12(7.23) |  |  |
| Clinical symptoms, No. (%) |  |  |  | 0.39 | 0.823 |
| 0 | 1121 | 1017(60.21) | 104(62.65) |  |  |
| 1 | 526 | 482(28.54) | 44(26.51) |  |  |
| ≥2 | 208 | 190(11.25) | 18(10.84) |  |  |
| Diabetes, No. (%) |  |  |  | 0.08 | 0.784 |
| No | 1512 | 1378(81.59) | 134(80.72) |  |  |
| Yes | 343 | 311(18.41) | 32(19.28) |  |  |
| Hypertension, No. (%) |  |  |  | 0.61 | 0.434 |
| No | 1366 | 1248(73.89) | 118(71.08) |  |  |
| Yes | 489 | 441(26.11) | 48(28.92) |  |  |
| Hyperlipemia, No. (%) |  |  |  | 0.001 | 0.979 |
| No | 1510 | 1375(81.41) | 135(81.33) |  |  |
| Yes | 345 | 314(18.59) | 31(18.67) |  |  |
| Cancer history, No. (%) |  |  |  | 0.004 | 0.953 |
| No | 1723 | 1569(92.90) | 154(92.77) |  |  |
| Yes | 132 | 120(7.10) | 12(7.23) |  |  |
| Family history, No. (%) |  |  |  | 5.71 | 0.017 |
| No | 1776 | 1623(96.09) | 153(92.17) |  |  |
| Yes | 79 | 66(3.91) | 13(7.83) |  |  |
| SII grouping, No. (%) |  |  |  | 4.52 | 0.211 |
| Q1 group | 464 | 432(25.58) | 32(19.28) |  |  |
| Q2 group | 463 | 423(25.04) | 40(24.10) |  |  |
| Q3 group | 464 | 420(24.87) | 44(26.51) |  |  |
| Q4 group | 464 | 414(24.51) | 50(30.12) |  |  |
| ΔSII grouping, No. (%) |  |  |  | 12.55 | 0.002 |
| ΔSII<-0.15 group | 668 | 617(36.53) | 51(30.72) |  |  |
| -0.15≤ΔSII≤0.15 group | 491 | 459(27.18) | 32(19.28) |  |  |
| ΔSII＞0.15 group | 696 | 613(36.29) | 83(50.00) |  |  |
| Baseline SII, median(Q1, Q3) | 1855 | 364.11  (272.78,510.33) | 395.06  (288.68,543.63) | -1.56 | 0.118 |
| ΔSII,median(Q1, Q3) | 1855 | -0.01(-0.27,0.35) | 0.15(-0.22,0.47) | -2.39 | 0.017 |
| **Abbreviations:** BMI, body mass index; Q1 group, SII <275.60×10⁹/L; Q2 group, 275.60≤ SII <368.07×10⁹/L; Q3 group, 368.07≤ SII <513.62×10⁹/L; Q4 group, SII ≥513.62×10⁹/L. | | | | | |

**Table S2.** ACRN recurrence rates stratified by SII levals and changes

| Variables | Recurrence cases | Incidence density | CIR | *P* value | *P* for trend |
| --- | --- | --- | --- | --- | --- |
| Baseline SII | 166 | 8.95% | 8.95% |  |  |
| SII grouping |  |  |  | 0.211 | 0.035 |
| Q1 group（n=464） | 32 | 1.73% | 6.90% |  |  |
| Q2 group（n=463） | 40 | 2.16% | 8.64% |
| Q3 group（n=464） | 44 | 2.37% | 9.48% |
| Q4 group（n=464） | 50 | 2.70% | 10.78% |
| ΔSII grouping |  |  |  | 0.002 | 0.005 |
| ΔSII<-0.15 group (n=668) | 51 | 2.75% | 7.63% |  |  |
| -0.15≤ΔSII≤0.15 group (n=491) | 32 | 1.73% | 6.52% |
| ΔSII＞0.15 group (n=696) | 83 | 4.47% | 11.93% |

**Abbreviations**:CIR：cumulative life-incidence; Q1 group, SII <275.60×10⁹/L; Q2 group, 275.60≤ SII <368.07×10⁹/L; Q3 group, 368.07≤ SII <513.62×10⁹/L; Q4 group, SII ≥513.62×10⁹/L.

**Table S3.** Univariable Cox proportional hazards regression Analysis for postoperative ACRN recurrence

| Variables | B | HR(95%*CI*) | *P* value |
| --- | --- | --- | --- |
| Sex |  |  |  |
| Female |  | Ref |  |
| Male | -0.08 | 0.93(0.67-1.28) | 0.634 |
| Age |  |  |  |
| 18-44 |  | Ref |  |
| 45-60 | -0.03 | 0.97(0.59 -1.58 ) | 0.895 |
| ≥60 | 0.56 | 1.75(1.08-2.83) | 0.023 |
| Smoking history |  |  |  |
| No |  | Ref |  |
| Yes | -0.02 | 0.98(0.67-1.44) | 0.920 |
| Alcohol consumption history |  |  |  |
| No |  | Ref |  |
| Yes | -0.08 | 0.92(0.65-1.30) | 0.640 |
| BMI |  |  |  |
| <18.5kg/m2 |  | Ref |  |
| 18.5-23.9kg/m2 | -1.48 | 0.23(0.03-1.64) | 0.141 |
| >23.9kg/m2 | 0.12 | 1.12(0.82-1.54) | 0.468 |
| Adenoma number |  |  |  |
| 1 |  | Ref |  |
| 2 | 0.52 | 1.68(1.16-2.43) | 0.006 |
| ≥3 | 1.22 | 3.38(2.09-5.45) | <0.001 |
| Adenoma size |  |  |  |
| 1~5mm |  | Ref |  |
| 6~10mm | 0.39 | 1.48(0.99-2.21) | 0.059 |
| >10mm | 0.98 | 2.66(1.87-3.78) | <0.001 |
| Adenoma histology |  |  |  |
| Tubular adenoma |  | Ref |  |
| Tubulovillous adenoma or villous adenoma | 0.37 | 1.45(1.06-1.97) | 0.020 |
| Adenoma location |  |  |  |
| Distal colon or rectum |  | Ref |  |
| Proximal colon | 0.08 | 1.08(0.76-1.53) | 0.654 |
| Both | 0.83 | 2.29(1.54-3.40) | <0.001 |
| Grade of adenoma dysplasia |  |  |  |
| Low-grade dysplasia |  | Ref |  |
| High-grade dysplasia | 1.17 | 3.24(2.11-4.97) | <0.001 |
| Abdominal pain |  |  |  |
| No |  | Ref |  |
| Yes | 0.03 | 1.03(0.72-1.48) | 0.883 |
| Abdominal distension |  |  |  |
| No |  | Ref |  |
| Yes | 0.07 | 1.08(0.63-1.83) | 0.791 |
| Change in bowel habits |  |  |  |
| No |  | Ref |  |
| Yes | 0.04 | 1.04(0.58-1.87) | 0.899 |
| Change in stool consistency |  |  |  |
| No |  | Ref |  |
| Yes | 0.33 | 1.38(0.84-2.29) | 0.206 |
| Clinical symptoms |  |  |  |
| 0 |  | Ref |  |
| 1 | 0.14 | 1.15(0.81-1.64) | 0.448 |
| ≥2 | 0.15 | 1.16(0.70-1.91) | 0.568 |
| Diabetes |  |  |  |
| No |  | Ref |  |
| Yes | 0.00 | 1.00(0.68-1.47) | 1.00 |
| Hypertension |  |  |  |
| No |  | Ref |  |
| Yes | 0.07 | 1.07(0.76-1.50) | 0.696 |
| Hyperlipemia |  |  |  |
| No |  | Ref |  |
| Yes | -0.19 | 0.83(0.56-1.23) | 0.345 |
| Cancer history |  |  |  |
| No |  | Ref |  |
| Yes | 0.13 | 1.14(0.63-2.05) | 0.668 |
| Family history |  |  |  |
| No |  | Ref |  |
| Yes | 0.57 | 1.77(1.01-3.13) | 0.047 |

**Abbreviations:** HR, hazard ratio;BMI, body mass index; B, Beta.

**Table S4**. Sensitivity Analysis of SII levels and changes and postoperative ACRN recurrence risk

| Variables | Model 1 | | Model 2 | | Model 3 | | Model 4 | |
| --- | --- | --- | --- | --- | --- | --- | --- | --- |
| HR  (95%*CI*) | *P* value | HR  (95%*CI*) | *P* value | HR  (95%*CI*) | *P* value | HR  (95%*CI*) | *P* value |
| SII | 1.00  (1.00-1.00) | <0.001 | 1.00  (1.00-1.00) | <0.001 | 1.00  (1.00-1.00) | 0.007 |  |  |
| SII grouping |  |  |  |  |  |  |  |  |
| Q1 group | Ref |  | Ref |  | Ref |  |  |  |
| Q2 group | 1.20  (0.68-1.76) | 0.704 | 1.09  (0.68-1.74) | 0.734 | 1.13  (0.71-1.82) | 0.606 |  |  |
| Q3 group | 1.29  (0.81-2.06) | 0.286 | 1.28  (0.80-2.05) | 0.303 | 1.28  (0.80-2.05) | 0.302 |  |  |
| Q4 group | 1.72  (1.08-2.73) | 0.022 | 1.71  (1.08-2.72) | 0.023 | 1.61  (1.01-2.57) | 0.047 |  |  |
| *P* for trend |  | 0.016 |  | 0.016 |  | 0.039 |  |  |
| ΔSII grouping |  |  |  |  |  |  |  |  |
| ΔSII<-0.15 group | 1.37  (0.85-2.21) | 0.197 | 1.37  (0.85-2.21) | 0.200 | 1.32  (0.82-2.14) | 0.256 | 1.10  (0.67-1.80) | 0.719 |
| -0.15≤ΔSII≤0.15 group | Ref |  | Ref |  | Ref |  | Ref |  |
| ΔSII＞0.15 group | 1.80  (1.16-2.81) | 0.009 | 1.80  (1.15-2.80) | 0.010 | 1.96  (1.25-3.08) | 0.003 | 2.15  (1.37-3.38) | <0.001 |
| *P* for trend |  | 0.007 |  | 0.007 |  | 0.002 |  | <0.001 |

**Notes:** Model 1: Unadjusted; Model 2: Adjusted for age; Model 3: Adjusted for age, adenoma number, adenoma size, adenoma histology, adenoma location, adenoma dysplasia grade, and family history; Model 4: Further adjusted for SII grouping in addition to all covariates in Model 3.

**Abbreviations:** HR, hazard ratio; CI, confidence interval; Q1 group, SII <275.60×10⁹/L; Q2 group, 275.60≤ SII <368.07×10⁹/L; Q3 group, 368.07≤ SII <513.62×10⁹/L; Q4 group, SII ≥513.62×10⁹/L.


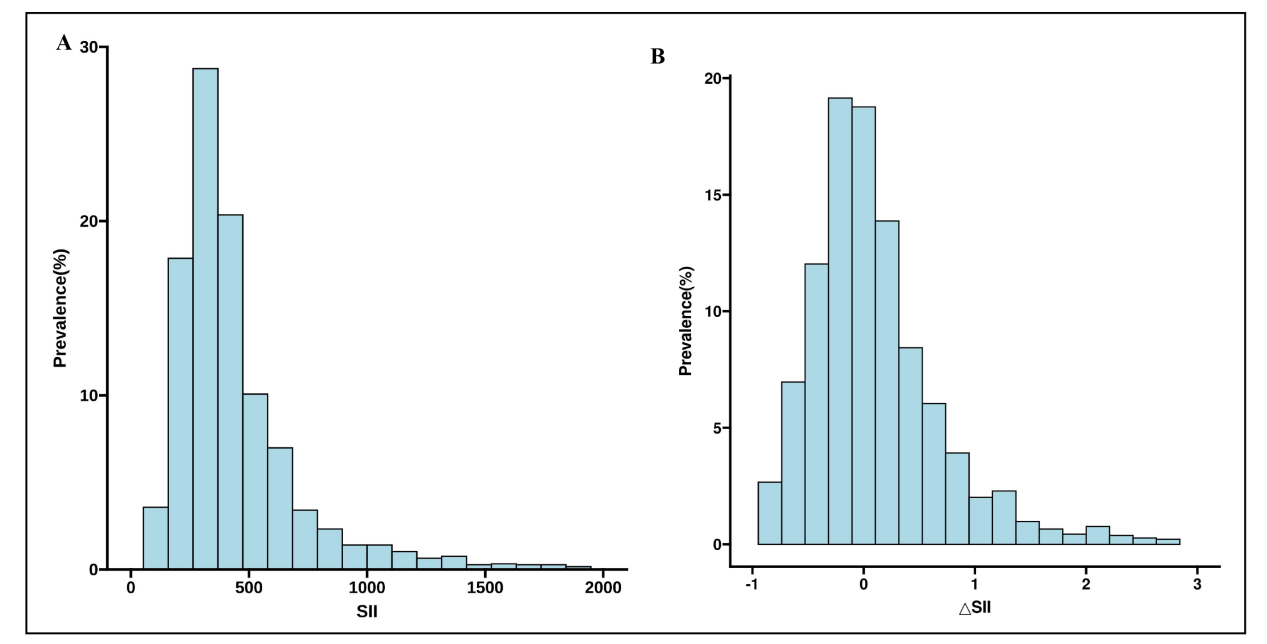


**Figure S1.** Distribution of baseline SII and ΔSII

Figure S1(A) shows the distribution of baseline SII values;

Figure S1(B) shows the distribution of ΔSII.


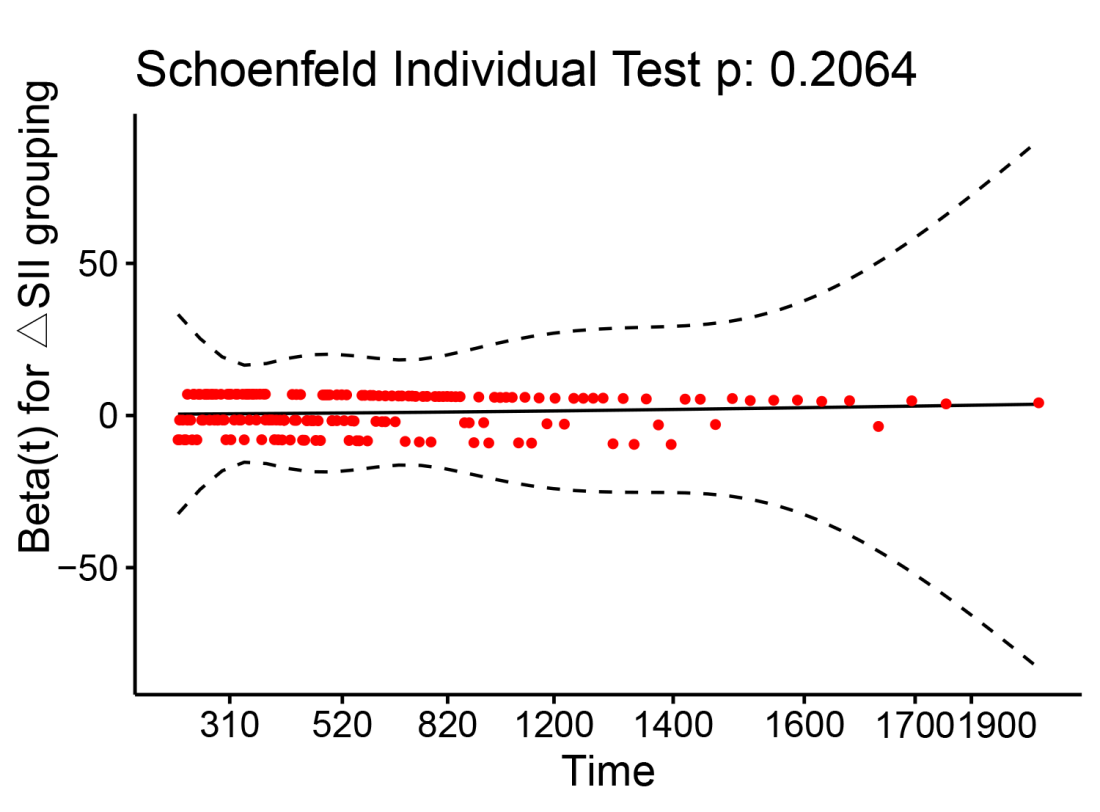


**Figure S2**. Residual plots for the association between ΔSII
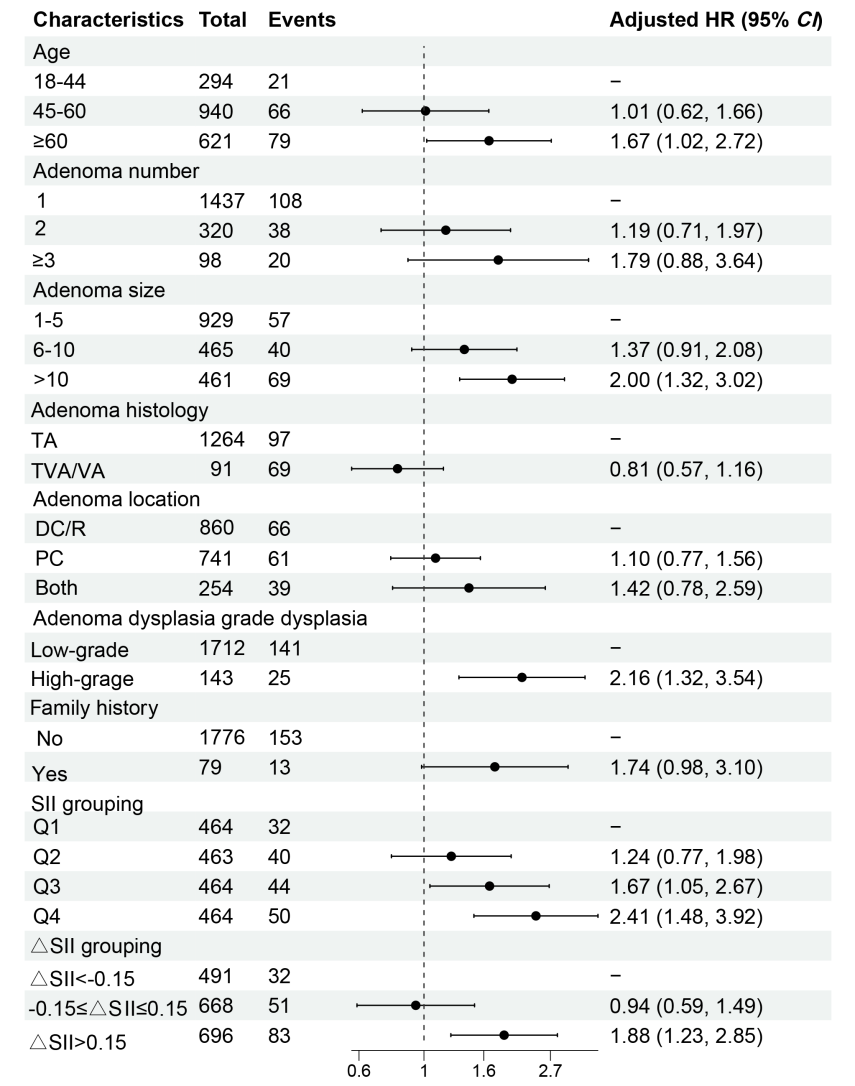


**Figure S3.** Forest plot of independent factors for **postoperative ACRN recurrence**

**Abbreviations:**TA, Tubular adenoma; TVA, Tubulovillous adenoma; VA, villous adenoma; DC, Distal colon; R, rectum; PC, Proximal colon.


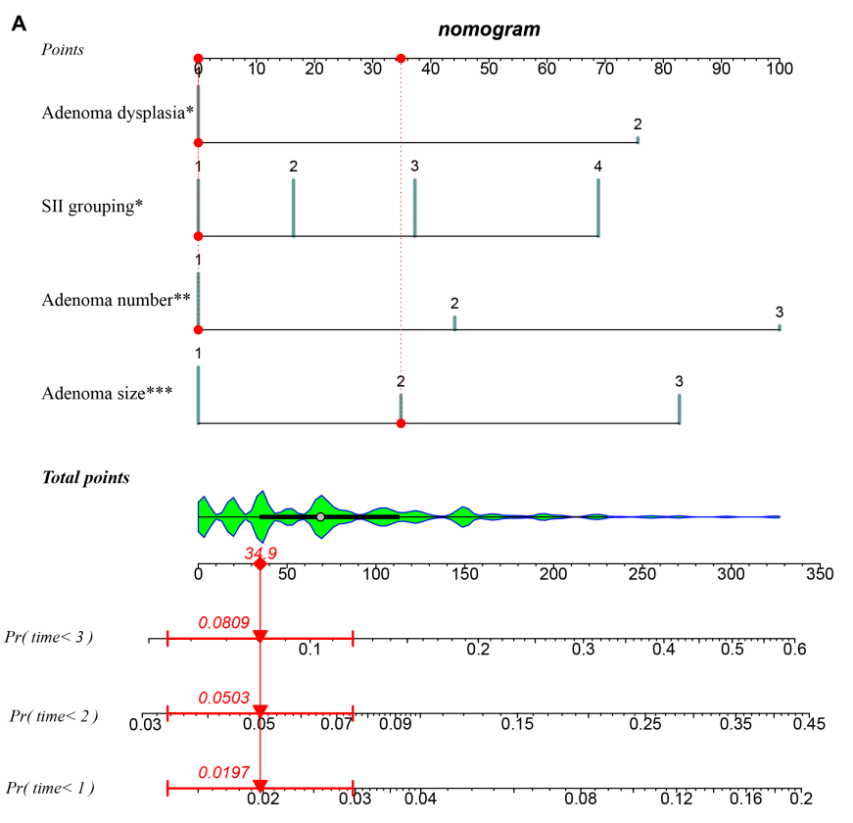

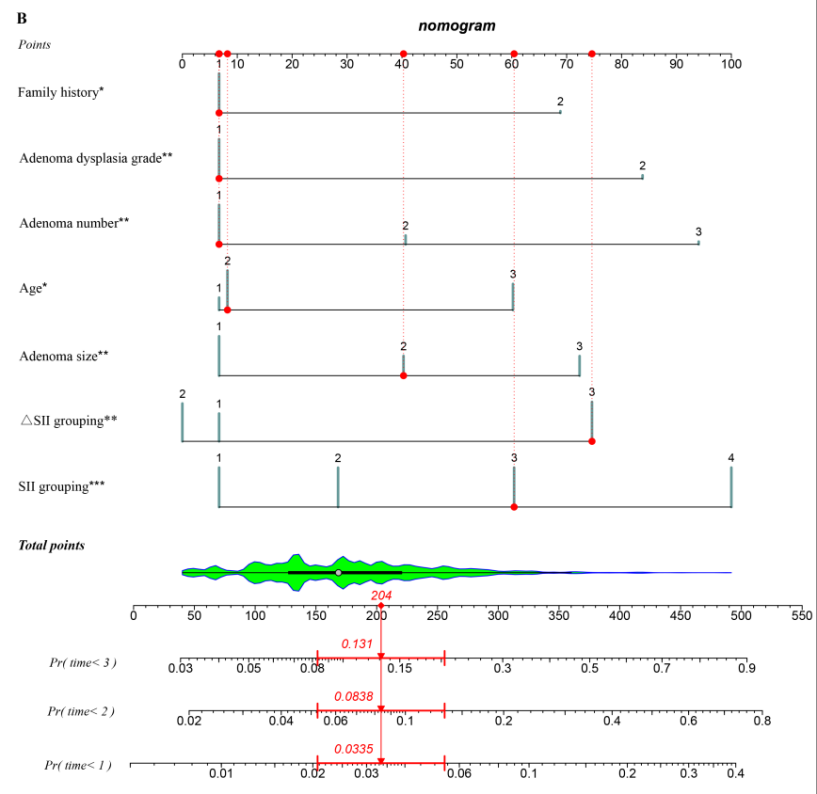


**Figure S4.** Nomogram predictive model for postoperative ACRN recurrence

**Notes:** **P* <0.05; ***P*<0.01; ****P*<0.001

For Model 3 (SII grouping): Variables significantly predicting ACRN recurrence included baseline adenoma dysplasia grade, SII grouping, adenoma number, and adenoma size (all *P* <0.05). Based on the total nomogram score, the predicted probability of ACRN recurrence was 8.09% at 1 year, 5.03% at 2 years, and 1.97% at 3 years (**Figure S4A**).

For Model 4 (ΔSII grouping): Significant predictors comprised family history, adenoma dysplasia grade, adenoma number, age, adenoma size, **ΔSII** grouping, and SII grouping (all *P* <0.05). The nomogram-predicted recurrence probabilities were 13.1% at 1 year, 8.38% at 2 years, and 3.35% at 3 years (**Figure S4B**).
